# Supplementary material
Source: publisher figshare collection journal article supplement (https://acs.figshare.com/ndownloader/files/4505548)
Supplement: Supplementary file 1 [file 4505548]

# Spin Polarized Conductance in Hybrid Graphene Nanoribbons Using 5-7 Defects

*Andrés R. Botello-Méndez<sup>a</sup>, Eduardo Cruz-Silva<sup>b</sup>, Florentino López-Urías<sup>a</sup>, Bobby G. Sumpter<sup>b</sup>, Vincent  
Meunier<sup>b</sup>, Mauricio Terrones<sup>a,\*</sup> and Humberto Terrones<sup>a</sup>*

<sup>a</sup> Laboratory for Nanoscience and Nanotechnology Research (LINAN) & Advanced Materials

Department, IPICYT, Camino a la Presa San José, 2055,

San Luis Potosí 78216, México

<sup>b</sup> Oak Ridge National Laboratory. P.O. Box 2008, Oak Ridge, TN 37831-6367,

AUTHOR EMAIL ADDRESS [mterrones@ipicyt.edu.mx](mailto:mterrones@ipicyt.edu.mx)

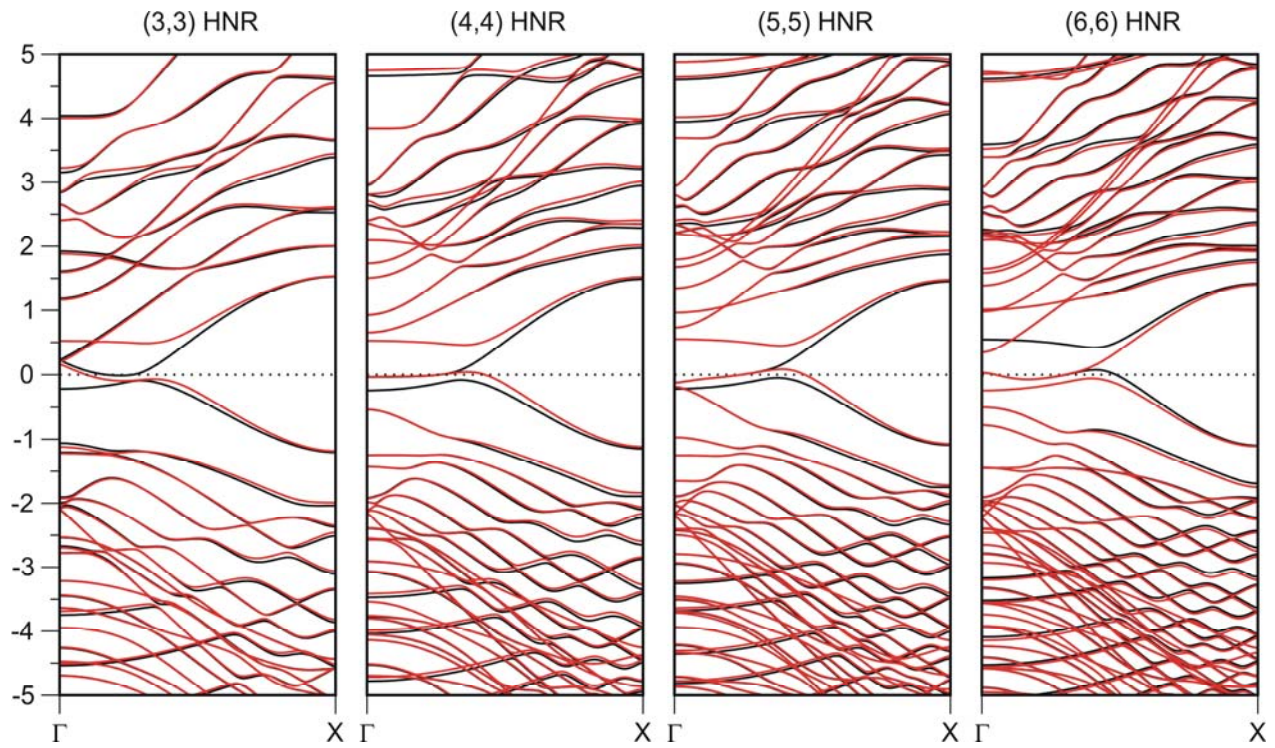

**Supplemental Figure 1.** Band structure for (3,3), (4,4), (5,5) and (6,6) hybrid nanoribbons obtained using the PBE functional with the s-GGA approximation. It can be observed that in this case, the (5,5) nanoribbon also exhibits an energy gap for the minority carriers. Also, note that for the (6,6) the gap is present in the majority carriers.
